# Supplementary material
Source: Springer Nature journal article supplement (https://www.springermedizin.de/resource/supplementary/12943_2010_772_MOESM2_ESM.pdf/9554782)

3' FUS gene (part. exon 11) | DDIT3 gene (part. exon 2) 5'

G G G C G A G G A G T G T T C A A G A A G  
 387 388 389 390 391 392 393

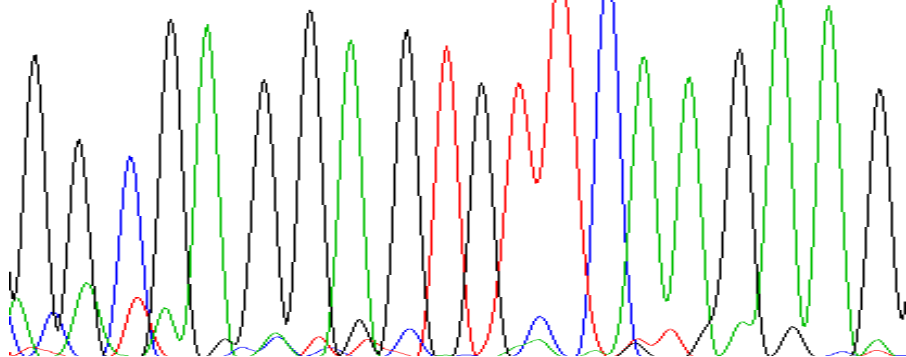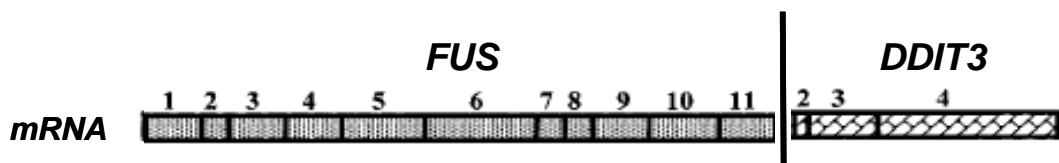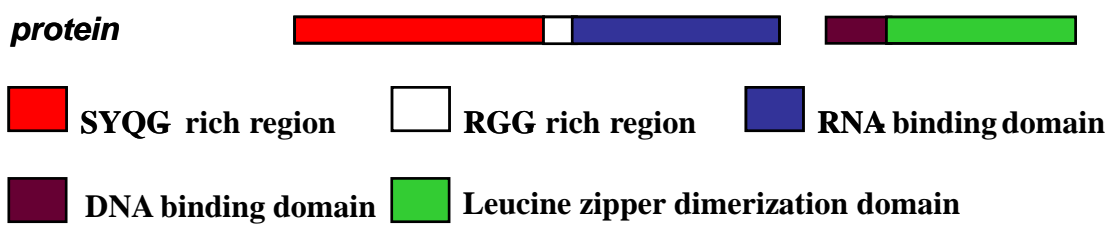

Supplement: MOESM2 [file 9554782]
